# Supplementary material for: Evaluation of aerosol microphysical, optical and radiative properties measured with a multiwavelength photometer
Source: Copernicus journal article supplement (doi:10.5194/amt-15-2139-2022), 2022-04-08
Supplement: Supplementary file 1 [file amt-15-2139-2022-supplement.zip]

Archive with 3 entries (3 files):
- amt-15-2139-2022-supplement-title-page.pdf
- Figure S2. AOD bias box diagrams of CARSNET AOD.pdf
- Figure S1. Validation of CARSNET AOD.pdf
