# Supplementary material for: Evaluation of aerosol microphysical, optical and radiative properties measured with a multiwavelength photometer
Source: Copernicus journal article supplement (doi:10.5194/amt-15-2139-2022), 2022-04-08
Supplement: Supplementary file 1 [file amt-15-2139-2022-supplement.zip › amt-15-2139-2022-supplement-title-page.pdf]

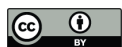

*Supplement of*

## **Evaluation of aerosol microphysical, optical and radiative properties measured with a multiwavelength photometer**

**Yu Zheng et al.**

*Correspondence to:* Huizheng Che (chehz@cma.gov.cn)

- amt-15-2139-2022-supplement-title-page.pdf
- Figure S1. Validation of CARSNET AOD.pdf
- Figure S2. AOD bias box diagrams of CARSNET AOD.pdf

The copyright of individual parts of the supplement might differ from the article licence.
