# Supplementary figures and images for: Evaluation of aerosol microphysical, optical and radiative properties measured with a multiwavelength photometer
Source: Copernicus journal article supplement (doi:10.5194/amt-15-2139-2022), 2022-04-08

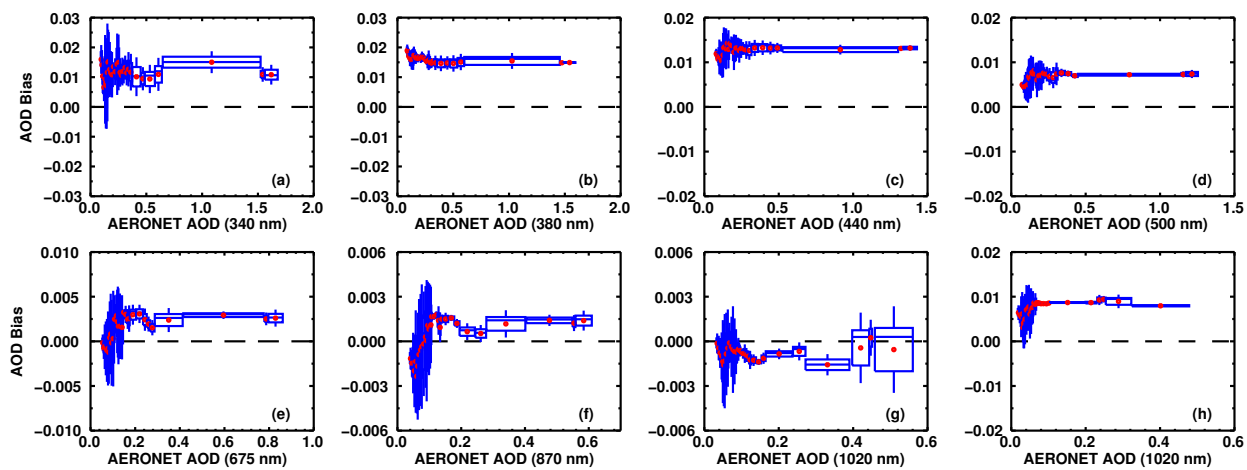

Supplement: Supplementary file 1 [file amt-15-2139-2022-supplement.zip › Figure S2. AOD bias box diagrams of CARSNET AOD.pdf]

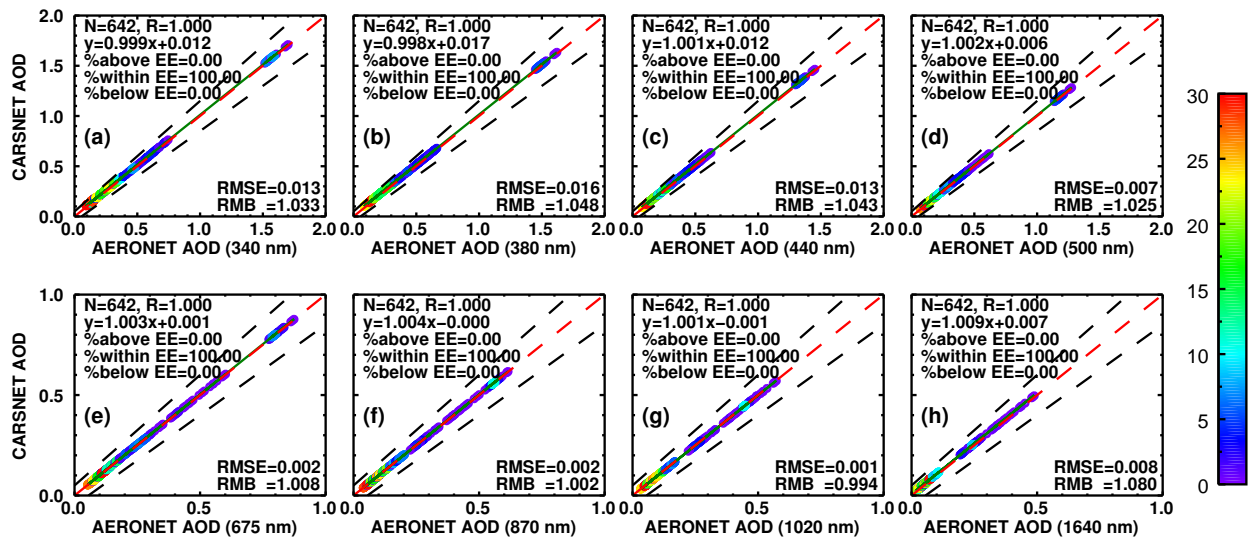

Supplement: Supplementary file 1 [file amt-15-2139-2022-supplement.zip › Figure S1. Validation of CARSNET AOD.pdf]
